# Supplementary material
Source: publisher figshare collection journal article supplement (https://karger.figshare.com/ndownloader/files/22739222)
Supplement: Supplementary file 1 [file 22739222]

**VIDEO LEGENDS**

**Video 1:** Endoscopic procedure of balloon’s fluid replacement in Case 1.
